# Supplementary material for: US Food and Drug Administration Review Time of Supplemental New Indication Approvals of Drugs and Biologics, 2017 to 2019
Source: PubMed Central journal article supplement (PMC10293905; doi:10.1001/jamanetworkopen.2023.18889), 2023-06-26
Supplement: jamanetwopen-e2318889-s001.pdf [file jamanetwopen-e2318889-s001.pdf]

## Data Sharing Statement

Dhodapkar. US Food and Drug Administration Review Time of Supplemental New Indication Approvals of Drugs and Biologics, 2017 to 2019. *JAMA Netw Open*. Published June 26, 2023. doi:10.1001/jamanetworkopen.2023.18889

### Data

**Data available:** No

### Additional Information

**Explanation for why data not available:** Data for this study will be made available upon request.
